# Supplementary material for: Genome-Wide Methylome Analyses Reveal Novel Epigenetic Regulation Patterns in Schizophrenia and Bipolar Disorder
Source: Biomed Res Int. 2015 Feb 4;2015:201587. doi: 10.1155/2015/201587 (PMC4334857; doi:10.1155/2015/201587)
Supplement: Supplementary file 1 — Supplemental Figure S1: The DNA methylation landscape of bipolar disease. Supplemental Figure S2: Genomic distribution of DMRs in bipolar disease. Supplemental Figure S3: Ultra DMRs are associated with gene- and CGI-related regions. Supplemental Figure S4: Ultra DMRs are associated with gene- and CGI-related regions in BP. Supplemental Figure S5: Ultra DMRs are associated with gene- and CGI-related regions in SZ. Supplemental Figure S6: Ultra DMRs are associated with long CGIs and HCPs. Supplemental Figure S7: Common genes aberrant methylated in SZs and BPs. Supplementary Table 1:The hypermethylated and hypomethylated promoters in SZs. Supplementary Table 2:The Specific hypermethylated and hypomethylated promoters with distinct patterns in SZs. Supplementary Table 3: The hypermethylated and hypomethylated promoters in BPs. Supplementary Table 4: KEGG pathways enriched by aberrant methylated genes specifically in SZs/normal. Supplementary Table 5: KEGG pathways enriched by aberrant methylated genes in BPs. Supplementary Table 6: Aberrant hypermethylated HCP genes in SZs. [file 201587.f1.zip]

Archive with 7 entries (7 files):
- Supplementary files.doc
- Supplementary Table 1.xls
- Supplementary Table 2.doc
- Supplementary Table 3.xls
- Supplementary Table 4.xls
- Supplementary Table 5.xls
- Supplementary Table 6.xls
