# Supplementary material for: Genome-Wide Methylome Analyses Reveal Novel Epigenetic Regulation Patterns in Schizophrenia and Bipolar Disorder
Source: Biomed Res Int. 2015 Feb 4;2015:201587. doi: 10.1155/2015/201587 (PMC4334857; doi:10.1155/2015/201587)
Supplement: Supplementary file 1 — Supplemental Figure S1: The DNA methylation landscape of bipolar disease. Supplemental Figure S2: Genomic distribution of DMRs in bipolar disease. Supplemental Figure S3: Ultra DMRs are associated with gene- and CGI-related regions. Supplemental Figure S4: Ultra DMRs are associated with gene- and CGI-related regions in BP. Supplemental Figure S5: Ultra DMRs are associated with gene- and CGI-related regions in SZ. Supplemental Figure S6: Ultra DMRs are associated with long CGIs and HCPs. Supplemental Figure S7: Common genes aberrant methylated in SZs and BPs. Supplementary Table 1:The hypermethylated and hypomethylated promoters in SZs. Supplementary Table 2:The Specific hypermethylated and hypomethylated promoters with distinct patterns in SZs. Supplementary Table 3: The hypermethylated and hypomethylated promoters in BPs. Supplementary Table 4: KEGG pathways enriched by aberrant methylated genes specifically in SZs/normal. Supplementary Table 5: KEGG pathways enriched by aberrant methylated genes in BPs. Supplementary Table 6: Aberrant hypermethylated HCP genes in SZs. [file 201587.f1.zip › Supplementary Table 1.xls]

## Sheet: Sheet1
Supplementary Table 1.The hypermethylated and hypomethylated promoters in SZs.
Hypermethylated
chr	start	end	Refseq	gene symbol
chr1	152642292	152646292	NM_000565	IL6R
chr1	110054386	110058386	NM_000851	GSTM5
chr1	151386681	151390681	NM_001014291	SPRR2G
chr1	205195934	205199934	NM_001122979	FCAMR
chr1	224030137	224034137	NM_001130440	SRP9
chr1	61313533	61317533	NM_001145511	NFIA
chr1	205195934	205199934	NM_001170631	FCAMR
chr1	152642292	152646292	NM_001206866	IL6R
chr1	167340570	167344570	NM_001677	ATP1B1
chr1	158271880	158275880	NM_002241	KCNJ10
chr1	26726835	26730835	NM_002953	RPS6KA1
chr1	224030137	224034137	NM_003133	SRP9
chr1	6006659	6010659	NM_003636	KCNAB2
chr1	177083292	177087292	NM_004673	ANGPTL1
chr1	26097193	26101193	NM_005563	STMN1
chr1	150343416	150347416	NM_007113	TCHH
chr1	11629004	11633004	NM_012168	FBXO2
chr1	246085123	246089123	NM_015431	TRIM58
chr1	52838630	52842630	NM_015696	GPX7
chr1	16760998	16764998	NM_017940	NBPF1
chr1	16447145	16451145	NM_018994	FBXO42
chr1	149245596	149249596	NM_021222	PRUNE
chr1	154853709	154857709	NM_021817	HAPLN2
chr1	205195934	205199934	NM_032029	FCAMR
chr1	151843990	151847990	NM_080388	S100A16
chr1	6006659	6010659	NM_172130	KCNAB2
chr1	152642292	152646292	NM_181359	IL6R
chr1	26097193	26101193	NM_203399	STMN1
chr1	26097193	26101193	NM_203401	STMN1
chr10	115791795	115795795	NM_000684	ADRB1
chr10	135188856	135192856	NM_000773	CYP2E1
chr10	122204455	122208455	NM_001030059	PPAPDC1A
chr10	133993730	133997730	NM_001143757	LRRC27
chr10	133993603	133997603	NM_001143758	LRRC27
chr10	133993603	133997603	NM_001143759	LRRC27
chr10	6169314	6173314	NM_001145547	RBM17
chr10	85887164	85891164	NM_014394	GHITM
chr10	28860426	28864426	NM_016628	WAC
chr10	24910543	24914543	NM_020824	ARHGAP21
chr10	127717902	127721902	NM_021641	ADAM12
chr10	133993603	133997603	NM_030626	LRRC27
chr10	102808988	102812988	NM_030929	KAZALD1
chr10	89500854	89504854	NM_032810	ATAD1
chr10	6168954	6172954	NM_032905	RBM17
chr10	28860426	28864426	NM_100486	WAC
chr10	49978222	49982222	NM_144984	VSTM4
chr11	116203833	116207833	NM_000040	APOC3
chr11	56163540	56167540	NM_001002925	OR5AP2
chr11	123127497	123131497	NM_001005188	OR6X1
chr11	123637932	123641932	NM_001005198	OR8G5
chr11	5520366	5524366	NM_001005289	OR52H1
chr11	57944313	57948313	NM_001005566	OR5B2
chr11	47956685	47960685	NM_001098503	PTPRJ
chr11	116518209	116522209	NM_001184746	PAFAH1B2
chr11	116518209	116522209	NM_001184747	PAFAH1B2
chr11	116518209	116522209	NM_001184748	PAFAH1B2
chr11	117360315	117364315	NM_001558	IL10RA
chr11	107531327	107535327	NM_002519	NPAT
chr11	116518209	116522209	NM_002572	PAFAH1B2
chr11	47956685	47960685	NM_002843	PTPRJ
chr11	118330217	118334217	NM_006760	UPK2
chr11	60624505	60628505	NM_014207	CD5
chr11	307672	311672	NM_021034	IFITM3
chr11	124139603	124143603	NM_024631	MSANTD2
chr11	277137	281137	NM_025092	ATHL1
chr11	92518497	92522497	NM_152313	SLC36A4
chr11	119584956	119588956	NM_178507	OAF
chr11	108796055	108800055	NM_207645	C11orf87
chr12	109568873	109572873	NM_001040107	HVCN1
chr12	102217862	102221862	NM_001099336	C12orf42
chr12	43970732	43974732	NM_001142678	ANO6
chr12	54362620	54366620	NM_001144996	ITGA7
chr12	54362620	54366620	NM_001144997	ITGA7
chr12	104246543	104250543	NM_001145199	C12orf75
chr12	109568873	109572873	NM_001256413	HVCN1
chr12	54362620	54366620	NM_002206	ITGA7
chr12	28004520	28008520	NM_002820	PTHLH
chr12	129210956	129214956	NM_007197	FZD10
chr12	55894844	55898844	NM_007224	NXPH4
chr12	109568873	109572873	NM_032369	HVCN1
chr12	108634569	108638569	NM_032829	FAM222A
chr12	53322641	53326641	NM_053283	DCD
chr12	54359596	54363596	NM_152637	METTL7B
chr12	52731927	52735927	NM_153633	HOXC4
chr12	102217862	102221862	NM_198521	C12orf42
chr12	28004520	28008520	NM_198964	PTHLH
chr13	47773883	47777883	NM_000321	RB1
chr13	57101789	57105789	NM_001040429	PCDH17
chr13	107717977	107721977	NM_001145645	TNFSF13B
chr13	23891068	23895068	NM_006437	PARP4
chr13	107717977	107721977	NM_006573	TNFSF13B
chr13	75230797	75234797	NM_015842	LMO7
chr14	95738887	95742887	NM_000623	BDKRB2
chr14	30430755	30434755	NM_001083893	STRN3
chr14	53931422	53935422	NM_001130851	CDKN3
chr14	30411491	30415491	NM_001135058	COCH
chr14	30411491	30415491	NM_004086	COCH
chr14	53931422	53935422	NM_005192	CDKN3
chr14	91403507	91407507	NM_006329	FBLN5
chr14	20281938	20285938	NM_006683	EDDM3A
chr14	30430755	30434755	NM_014574	STRN3
chr15	40436989	40440989	NM_000070	CAPN3
chr15	41274717	41278717	NM_000119	EPB42
chr15	23131488	23135488	NM_000462	UBE3A
chr15	24660958	24664958	NM_000810	GABRA5
chr15	32602775	32606775	NM_001023567	GOLGA8B
chr15	41274717	41278717	NM_001114134	EPB42
chr15	65215412	65219412	NM_001145103	SMAD3
chr15	94674797	94678797	NM_001145156	NR2F2
chr15	94675572	94679572	NM_001145157	NR2F2
chr15	73921439	73925439	NM_001145335	UBE2Q2
chr15	24661365	24665365	NM_001165037	GABRA5
chr15	76248241	76252241	NM_001199377	ACSBG1
chr15	43438613	43442613	NM_001482	GATM
chr15	86981042	86985042	NM_002201	ISG20
chr15	57740353	57744353	NM_004330	BNIP2
chr15	76248241	76252241	NM_015162	ACSBG1
chr15	66131625	66135625	NM_016166	PIAS1
chr15	42504870	42508870	NM_016396	CTDSPL2
chr15	40436989	40440989	NM_024344	CAPN3
chr15	23131488	23135488	NM_130838	UBE3A
chr15	23131488	23135488	NM_130839	UBE3A
chr15	40436989	40440989	NM_173087	CAPN3
chr15	73920676	73924676	NM_173469	UBE2Q2
chr16	1815225	1819225	NM_001018104	FAHD1
chr16	54245852	54249852	NM_001043	SLC6A2
chr16	1815225	1819225	NM_001142398	FAHD1
chr16	27120796	27124796	NM_001145348	KDM8
chr16	54245042	54249042	NM_001172501	SLC6A2
chr16	54246056	54250056	NM_001172504	SLC6A2
chr16	2463147	2467147	NM_001199107	TBC1D24
chr16	84202424	84206424	NM_014615	KIAA0182
chr16	11678443	11682443	NM_015914	TXNDC11
chr16	2463147	2467147	NM_020705	TBC1D24
chr16	27120307	27124307	NM_024773	KDM8
chr16	1815225	1819225	NM_031208	FAHD1
chr16	56052051	56056051	NM_032940	POLR2C
chr17	41770521	41774521	NM_001039083	ARL17B
chr17	53950609	53954609	NM_001198713	2012-09-04
chr17	37429119	37433119	NM_001242704	ZNF385C
chr17	53950609	53954609	NM_001256782	2012-09-04
chr17	53950609	53954609	NM_001256822	2012-09-04
chr17	43959805	43963805	NM_002144	HOXB1
chr17	43979230	43983230	NM_002146	HOXB3
chr17	24093149	24097149	NM_004295	TRAF4
chr17	53950609	53954609	NM_004574	2012-09-04
chr17	53401908	53405908	NM_007146	VEZF1
chr17	53585513	53589513	NM_012374	OR4D1
chr17	35078900	35082900	NM_033419	PGAP3
chr17	53950609	53954609	NM_080415	2012-09-04
chr17	53950609	53954609	NM_080416	2012-09-04
chr17	15344302	15348302	NM_145301	FAM18B2
chr18	5878183	5882183	NM_001080209	TMEM200C
chr18	42794728	42798728	NM_001100817	TCEB3CL
chr18	42800655	42804655	NM_001100817	TCEB3CL
chr18	42794728	42798728	NM_001242907	LOC100506888
chr18	42800655	42804655	NM_001242907	LOC100506888
chr18	53251914	53255914	NM_004852	ONECUT2
chr18	29410538	29414538	NM_030632	ASXL3
chr18	42800655	42804655	NM_145653	TCEB3C
chr18	3439590	3443590	NM_170695	TGIF1
chr18	3439590	3443590	NM_173210	TGIF1
chr18	3441771	3445771	NM_173211	TGIF1
chr19	62748154	62752154	NM_001039654	ZNF550
chr19	52213982	52217982	NM_002517	NPAS1
chr19	44587326	44591326	NM_003407	ZFP36
chr19	35122985	35126985	NM_003796	URI1
chr19	43500323	43504323	NM_004823	KCNK6
chr19	40323993	40327993	NM_022006	FXYD7
chr19	23625547	23629547	NM_138330	ZNF675
chr19	15478335	15482335	NM_173483	CYP4F22
chr19	17440299	17444299	NM_198580	SLC27A1
chr2	95374494	95378494	NM_001034914	KCNIP3
chr2	86992445	86996445	NM_001078170	RGPD2
chr2	74492810	74496810	NM_001145054	C2orf81
chr2	201382513	201386513	NM_001207067	BZW1
chr2	201383300	201387300	NM_001207068	BZW1
chr2	201383152	201387152	NM_001207069	BZW1
chr2	155261338	155265338	NM_001260508	KCNJ3
chr2	155261338	155265338	NM_001260509	KCNJ3
chr2	155261338	155265338	NM_001260510	KCNJ3
chr2	8737563	8741563	NM_002166	ID2
chr2	155261338	155265338	NM_002239	KCNJ3
chr2	182247077	182251077	NM_002500	NEUROD1
chr2	208100860	208104860	NM_004379	CREB1
chr2	235064424	235068424	NM_005737	ARL4C
chr2	201382513	201386513	NM_014670	BZW1
chr2	33590445	33594445	NM_015376	RASGRP3
chr2	68236508	68240508	NM_020143	PNO1
chr2	85832419	85836419	NM_032827	ATOH8
chr2	202215841	202219841	NM_033066	MPP4
chr2	208100860	208104860	NM_134442	CREB1
chr2	42126664	42130664	NM_138370	PKDCC
chr2	19412726	19416726	NM_145260	OSR1
chr2	222995565	222999565	NM_152386	SGPP2
chr2	204004783	204008783	NM_213589	RAPH1
chr20	34633289	34637289	NM_001199513	TGIF2
chr20	34633289	34637289	NM_001199514	TGIF2
chr20	43872661	43876661	NM_007019	UBE2C
chr20	47984320	47988320	NM_018683	RNF114
chr20	34633423	34637423	NM_021809	TGIF2
chr20	771284	775284	NM_031424	FAM110A
chr20	61105775	61109775	NM_080606	BHLHE23
chr20	2800141	2804141	NM_080840	PTPRA
chr20	29438431	29442431	NM_153323	DEFB119
chr20	43872661	43876661	NM_181799	UBE2C
chr20	43872661	43876661	NM_181800	UBE2C
chr20	43873078	43877078	NM_181801	UBE2C
chr20	43872661	43876661	NM_181802	UBE2C
chr20	43872661	43876661	NM_181803	UBE2C
chr21	45128296	45132296	NM_000211	ITGB2
chr21	45128296	45132296	NM_001127491	ITGB2
chr21	33695071	33699071	NM_005534	IFNGR2
chr22	36943243	36947243	NM_001195071	TMEM184B
chr22	36943243	36947243	NM_001195072	TMEM184B
chr22	37706350	37710350	NM_004900	APOBEC3B
chr22	36943243	36947243	NM_012264	TMEM184B
chr22	37800955	37804955	NM_021822	APOBEC3G
chr22	22361047	22365047	NM_153615	RGL4
chr3	197716146	197720146	NM_001077657	C3orf43
chr3	153538176	153542176	NM_001123228	TMEM14E
chr3	159294493	159298493	NM_001163678	SHOX2
chr3	23931298	23935298	NM_001253379	RPL15
chr3	23932199	23936199	NM_001253380	RPL15
chr3	23931656	23935656	NM_001253382	RPL15
chr3	23931621	23935621	NM_001253383	RPL15
chr3	23931298	23935298	NM_001253384	RPL15
chr3	57530129	57534129	NM_001660	ARF4
chr3	23931298	23935298	NM_002948	RPL15
chr3	159294493	159298493	NM_003030	SHOX2
chr3	57204983	57208983	NM_003865	HESX1
chr3	159294493	159298493	NM_006884	SHOX2
chr3	50335344	50339344	NM_007275	TUSC2
chr3	114190489	114194489	NM_014170	GTPBP8
chr3	185448138	185452138	NM_014693	ECE2
chr3	109579905	109583905	NM_014981	MYH15
chr3	8891879	8895879	NM_020165	RAD18
chr3	114915996	114919996	NM_025146	NAA50
chr3	46512488	46516488	NM_031440	RTP3
chr3	185448138	185452138	NM_032331	ECE2
chr3	127903752	127907752	NM_032343	CHCHD6
chr3	114412064	114416064	NM_033254	BOC
chr3	114190489	114194489	NM_138485	GTPBP8
chr3	157319030	157323030	NM_172160	KCNAB1
chr3	192465637	192469637	NM_198152	UTS2D
chr3	113804098	113808098	NM_199511	CCDC80
chr3	113804098	113808098	NM_199512	CCDC80
chr4	3736093	3740093	NM_000683	ADRA2C
chr4	15290449	15294449	NM_001145191	FAM200B
chr4	95391467	95395467	NM_001254949	SMARCAD1
chr4	88474714	88478714	NM_016245	HSD17B11
chr4	178465984	178469984	NM_018248	NEIL3
chr4	53421251	53425251	NM_023940	RASL11B
chr4	48178116	48182116	NM_152679	SLC10A4
chr5	63290033	63294033	NM_000524	HTR1A
chr5	78941998	78945998	NM_001114393	PAPD4
chr5	78941998	78945998	NM_001114394	PAPD4
chr5	133477196	133481196	NM_001134851	TCF7
chr5	138753533	138757533	NM_001161546	C5orf65
chr5	149865866	149869866	NM_001543	NDST1
chr5	134389322	134393322	NM_002653	PITX1
chr5	133476300	133480300	NM_003202	TCF7
chr5	56144656	56148656	NM_005921	MAP3K1
chr5	140205540	140209540	NM_014005	PCDHA9
chr5	139006484	139010484	NM_016463	CXXC5
chr5	140213817	140217817	NM_018901	PCDHA10
chr5	140696537	140700537	NM_018915	PCDHGA2
chr5	140712951	140716951	NM_018917	PCDHGA4
chr5	140731834	140735834	NM_018919	PCDHGA6
chr5	140842924	140846924	NM_018928	PCDHGC4
chr5	170666892	170670892	NM_021025	TLX3
chr5	111524213	111528213	NM_022140	EPB41L4A
chr5	7910271	7914271	NM_024091	FASTKD3
chr5	140205540	140209540	NM_031857	PCDHA9
chr5	140213817	140217817	NM_031859	PCDHA10
chr5	140213817	140217817	NM_031860	PCDHA10
chr5	140696537	140700537	NM_032009	PCDHGA2
chr5	140712951	140716951	NM_032053	PCDHGA4
chr5	140731834	140735834	NM_032086	PCDHGA6
chr5	140842924	140846924	NM_032406	PCDHGC4
chr5	76179581	76183581	NM_130772	S100Z
chr5	157101332	157105332	NM_173491	LSM11
chr5	78941998	78945998	NM_173797	PAPD4
chr5	115324049	115328049	NM_173800	AQPEP
chr5	2803261	2807261	NM_178569	C5orf38
chr5	133477196	133481196	NM_201632	TCF7
chr5	133477196	133481196	NM_201634	TCF7
chr5	147250463	147254463	NM_206966	C5orf46
chr5	133477196	133481196	NM_213648	TCF7
chr6	73131152	73135152	NM_001168411	RIMS1
chr6	33695133	33699133	NM_002224	ITPR3
chr6	27939085	27943085	NM_003511	HIST1H2AL
chr6	26310851	26314851	NM_003545	HIST1H4E
chr6	6531932	6535932	NM_004271	LY86
chr6	27940548	27944548	NM_005322	HIST1H1B
chr6	143112296	143116296	NM_006734	HIVEP2
chr6	108720790	108724790	NM_145315	LACE1
chr7	93859808	93863808	NM_000089	COL1A2
chr7	129055154	129059154	NM_001040110	NRF1
chr7	1237179	1241179	NM_001080461	UNCX
chr7	149694811	149698811	NM_001099695	REPIN1
chr7	149694811	149698811	NM_001099696	REPIN1
chr7	95237753	95241753	NM_001135556	DYNC1I1
chr7	95237753	95241753	NM_001135557	DYNC1I1
chr7	2407720	2411720	NM_001243794	CHST12
chr7	2407720	2411720	NM_001243795	CHST12
chr7	2246382	2250382	NM_002452	NUDT1
chr7	95237753	95241753	NM_004411	DYNC1I1
chr7	143681421	143685421	NM_005435	ARHGEF5
chr7	141271625	141275625	NM_013252	CLEC5A
chr7	149694811	149698811	NM_013400	REPIN1
chr7	134481305	134485305	NM_018295	TMEM140
chr7	2407720	2411720	NM_018641	CHST12
chr7	87299749	87303749	NM_018843	SLC25A40
chr7	45578649	45582649	NM_021116	ADCY1
chr7	25138840	25142840	NM_138811	C7orf31
chr7	2246382	2250382	NM_198948	NUDT1
chr7	2246382	2250382	NM_198949	NUDT1
chr7	2246421	2250421	NM_198950	NUDT1
chr7	2246421	2250421	NM_198952	NUDT1
chr7	2247065	2251065	NM_198953	NUDT1
chr7	2247065	2251065	NM_198954	NUDT1
chr8	24826359	24830359	NM_001105541	NEFM
chr8	68019289	68023289	NM_001193502	TCF24
chr8	22599118	22603118	NM_001199880	EGR3
chr8	22599118	22603118	NM_001199881	EGR3
chr8	30613658	30617658	NM_001206847	LOC100507341
chr8	61590022	61594022	NM_001242644	RAB2A
chr8	6778754	6782754	NM_001925	DEFA4
chr8	98948486	98952486	NM_002380	MATN2
chr8	61590022	61594022	NM_002865	RAB2A
chr8	22599118	22603118	NM_004430	EGR3
chr8	17196676	17200676	NM_004686	MTMR7
chr8	24825178	24829178	NM_005382	NEFM
chr8	55119490	55123490	NM_006330	LYPLA1
chr8	126103684	126107684	NM_014846	KIAA0196
chr8	22490198	22494198	NM_021630	PDLIM2
chr8	121524846	121528846	NM_022045	MTBP
chr8	146246627	146250627	NM_023080	C8orf33
chr8	98948486	98952486	NM_030583	MATN2
chr8	86753946	86757946	NM_172239	REXO1L1
chr8	22491931	22495931	NM_176871	PDLIM2
chr8	22491931	22495931	NM_198042	PDLIM2
chr9	111848698	111852698	NM_001004065	AKAP2
chr9	78281076	78285076	NM_001097635	GCNT1
chr9	111848698	111852698	NM_001198656	AKAP2
chr9	103198983	103202983	NM_003452	ZNF189
chr9	101022390	101026390	NM_006808	SEC61B
chr9	103333953	103337953	NM_019592	RNF20
chr9	115365181	115369181	NM_134427	RGS3
chr9	2510	6510	NM_182905	WASH1
chr9	103198983	103202983	NM_197977	ZNF189
Hypomethylated
chr	start	end	Refseq	gene symbol
chr1	246877854	246881854	NM_001001824	OR2T27
chr1	246820753	246824753	NM_001004693	OR2T10
chr1	115059056	115063056	NM_001007553	CSDE1
chr1	226334983	226338983	NM_001024226	ARF1
chr1	226335473	226339473	NM_001024227	ARF1
chr1	226335473	226339473	NM_001024228	ARF1
chr1	159030487	159034487	NM_001033667	LY9
chr1	45565500	45569500	NM_001048171	MUTYH
chr1	45565500	45569500	NM_001048172	MUTYH
chr1	45565500	45569500	NM_001048173	MUTYH
chr1	45565500	45569500	NM_001048174	MUTYH
chr1	28715331	28719331	NM_001048194	RCC1
chr1	28715331	28719331	NM_001048195	RCC1
chr1	227631615	227635615	NM_001100	ACTA1
chr1	43384180	43388180	NM_001101376	FAM183A
chr1	95056485	95060485	NM_001114106	SLC44A3
chr1	45565500	45569500	NM_001128425	MUTYH
chr1	115059056	115063056	NM_001130523	CSDE1
chr1	160613319	160617319	NM_001135240	C1orf226
chr1	247108825	247112825	NM_001136036	ZNF692
chr1	154384358	154388358	NM_001193301	SEMA4A
chr1	247108825	247112825	NM_001193328	ZNF692
chr1	19840794	19844794	NM_001204084	NBL1
chr1	19842452	19846452	NM_001204085	NBL1
chr1	19842846	19846846	NM_001204086	NBL1
chr1	202750129	202754129	NM_001204171	MDM4
chr1	202750129	202754129	NM_001204172	MDM4
chr1	31812672	31816672	NM_001204414	TINAGL1
chr1	31814332	31818332	NM_001204415	TINAGL1
chr1	115059056	115063056	NM_001242891	CSDE1
chr1	115059056	115063056	NM_001242892	CSDE1
chr1	115059056	115063056	NM_001242893	CSDE1
chr1	154527101	154531101	NM_001256604	C1orf85
chr1	154527101	154531101	NM_001256605	C1orf85
chr1	154527101	154531101	NM_001256608	C1orf85
chr1	154527101	154531101	NM_001256609	C1orf85
chr1	95056485	95060485	NM_001258340	SLC44A3
chr1	95056485	95060485	NM_001258341	SLC44A3
chr1	95056485	95060485	NM_001258342	SLC44A3
chr1	95056485	95060485	NM_001258343	SLC44A3
chr1	159030487	159034487	NM_001261456	LY9
chr1	159030487	159034487	NM_001261457	LY9
chr1	28715331	28719331	NM_001269	RCC1
chr1	86705113	86709113	NM_001285	CLCA1
chr1	181073061	181077061	NM_001357	DHX9
chr1	226334983	226338983	NM_001658	ARF1
chr1	195053483	195057483	NM_002113	CFHR1
chr1	159030487	159034487	NM_002348	LY9
chr1	202750129	202754129	NM_002393	MDM4
chr1	201709505	201713505	NM_002725	PRELP
chr1	212226482	212230482	NM_002763	PROX1
chr1	28088635	28092635	NM_002946	RPA2
chr1	151627131	151631131	NM_002964	S100A8
chr1	144234346	144238346	NM_003637	ITGA10
chr1	56731006	56735006	NM_003713	PPAP2B
chr1	10455589	10459589	NM_004565	PEX14
chr1	76022473	76026473	NM_004582	RABGGTB
chr1	153300836	153304836	NM_005227	EFNA4
chr1	19841393	19845393	NM_005380	NBL1
chr1	152211368	152215368	NM_006694	JTB
chr1	115059056	115063056	NM_007158	CSDE1
chr1	160000657	160004657	NM_007348	ATF6
chr1	45565500	45569500	NM_012222	MUTYH
chr1	24942346	24946346	NM_013943	CLIC4
chr1	146468265	146472265	NM_015383	NBPF14
chr1	244952000	244956000	NM_016002	SCCPDH
chr1	247108825	247112825	NM_017865	ZNF692
chr1	151851355	151855355	NM_020672	S100A14
chr1	100774315	100778315	NM_022049	GPR88
chr1	31812672	31816672	NM_022164	TINAGL1
chr1	26476799	26480799	NM_031286	SH3BGRL3
chr1	85393943	85397943	NM_032184	SYDE2
chr1	20830534	20834534	NM_032409	PINK1
chr1	45563131	45567131	NM_032756	HPDL
chr1	15444354	15448354	NM_052929	FHAD1
chr1	154527101	154531101	NM_144580	C1orf85
chr1	1254588	1258588	NM_152228	TAS1R3
chr1	95056687	95060687	NM_152369	SLC44A3
chr1	109826083	109830083	NM_153340	ATXN7L2
chr1	180631874	180635874	NM_172000	TEDDM1
chr1	150859933	150863933	NM_178431	LCE3A
chr1	19879292	19883292	NM_181719	TMCO4
chr1	153300836	153304836	NM_182689	EFNA4
chr1	153300836	153304836	NM_182690	EFNA4
chr1	19840309	19844309	NM_182744	NBL1
chr1	201709505	201713505	NM_201348	PRELP
chr10	129235602	129239602	NM_001030013	NPS
chr10	115298579	115302579	NM_001177660	HABP2
chr10	57026755	57030755	NM_001190478	MTRNR2L5
chr10	63476975	63480975	NM_001244638	ARID5B
chr10	47214925	47218925	NM_001630	ANXA8L2
chr10	115300767	115304767	NM_004132	HABP2
chr10	14918266	14922266	NM_016299	HSPA14
chr10	73701682	73705682	NM_019058	DDIT4
chr10	12976630	12980630	NM_031455	CCDC3
chr10	111955352	111959352	NM_130439	MXI1
chr10	118411196	118415196	NM_144661	C10orf82
chr10	123736678	123740678	NM_206861	TACC2
chr10	123736678	123740678	NM_206862	TACC2
chr10	85921533	85925533	NM_207373	C10orf99
chr11	55341681	55345681	NM_001001952	OR5D18
chr11	46912826	46916826	NM_001003676	C11orf49
chr11	46912826	46916826	NM_001003677	C11orf49
chr11	46912826	46916826	NM_001003678	C11orf49
chr11	797935	801935	NM_001004	RPLP2
chr11	5397916	5401916	NM_001004757	OR51Q1
chr11	123943174	123947174	NM_001005194	OR8A1
chr11	55627094	55631094	NM_001005200	OR8H2
chr11	66960093	66964093	NM_001018070	CORO1B
chr11	44541716	44545716	NM_001024844	CD82
chr11	44024106	44028106	NM_001031854	ACCSL
chr11	14942790	14946790	NM_001033953	CALCA
chr11	133649484	133653484	NM_001080407	GLB1L3
chr11	64248958	64252958	NM_001098670	RASGRP2
chr11	64248958	64252958	NM_001098671	RASGRP2
chr11	61274696	61278696	NM_001127392	C11orf9
chr11	393715	397715	NM_001135053	SIGIRR
chr11	393715	397715	NM_001135054	SIGIRR
chr11	63030034	63034034	NM_001142537	LGALS12
chr11	63030034	63034034	NM_001142538	LGALS12
chr11	69920259	69924259	NM_001184740	CTTN
chr11	67149985	67153985	NM_001243750	NUDT8
chr11	110914442	110918442	NM_001258390	LAYN
chr11	110914442	110918442	NM_001258391	LAYN
chr11	44541716	44545716	NM_002231	CD82
chr11	119034912	119038912	NM_002855	PVRL1
chr11	9437087	9441087	NM_003442	ZNF143
chr11	301990	305990	NM_003641	IFITM1
chr11	67005080	67009080	NM_003977	AIP
chr11	2353122	2357122	NM_004356	CD81
chr11	69920259	69924259	NM_005231	CTTN
chr11	8669474	8673474	NM_005418	ST5
chr11	63203497	63207497	NM_006054	RTN3
chr11	118791864	118795864	NM_006288	THY1
chr11	129778027	129782027	NM_007037	ADAMTS8
chr11	2863902	2867902	NM_007105	SLC22A18AS
chr11	9640203	9644203	NM_015055	SWAP70
chr11	12353601	12357601	NM_018222	PARVA
chr11	27342083	27346083	NM_018490	LGR4
chr11	66960093	66964093	NM_020441	CORO1B
chr11	393715	397715	NM_021805	SIGIRR
chr11	46912826	46916826	NM_024113	C11orf49
chr11	47565791	47569791	NM_031909	C1QTNF4
chr11	65562811	65566811	NM_033036	GAL3ST3
chr11	69920259	69924259	NM_138565	CTTN
chr11	124126228	124130228	NM_138961	ESAM
chr11	8669474	8673474	NM_139157	ST5
chr11	18909935	18913935	NM_147199	MRGPRX1
chr11	113895646	113899646	NM_152315	FAM55A
chr11	64248958	64252958	NM_153819	RASGRP2
chr11	110914442	110918442	NM_178834	LAYN
chr11	67149984	67153984	NM_181843	NUDT8
chr11	63203497	63207497	NM_201428	RTN3
chr11	63203497	63207497	NM_201429	RTN3
chr11	63203497	63207497	NM_201430	RTN3
chr11	8669474	8673474	NM_213618	ST5
chr12	9109570	9113570	NM_000014	A2M
chr12	110687073	110691073	NM_000690	ALDH2
chr12	54758158	54762158	NM_001005915	ERBB3
chr12	25538518	25542518	NM_001145727	IFLTD1
chr12	110280837	110284837	NM_001177996	FAM109A
chr12	110280837	110284837	NM_001177997	FAM109A
chr12	30671181	30675181	NM_001190995	IPO8
chr12	110687073	110691073	NM_001204889	ALDH2
chr12	50883631	50887631	NM_001242696	LOC283403
chr12	54758075	54762075	NM_001982	ERBB3
chr12	52958754	52962754	NM_002136	HNRNPA1
chr12	50979915	50983915	NM_002284	KRT86
chr12	111978044	111982044	NM_004416	DTX1
chr12	118588143	118592143	NM_006253	PRKAB1
chr12	6948204	6952204	NM_006331	EMG1
chr12	30671181	30675181	NM_006390	IPO8
chr12	52958754	52962754	NM_031157	HNRNPA1
chr12	6615502	6619502	NM_032489	ACRBP
chr12	45894318	45898318	NM_138371	FAM113B
chr12	110280837	110284837	NM_144671	FAM109A
chr12	14812920	14816920	NM_175054	HIST4H4
chr12	99710504	99714504	NM_178826	ANO4
chr13	113544896	113548896	NM_000820	GAS6
chr13	98648679	98652679	NM_001144072	UBAC2
chr13	114096066	114100066	NM_001164144	CHAMP1
chr13	114096066	114100066	NM_001164145	CHAMP1
chr13	99978418	99982418	NM_001195087	A2LD1
chr13	45523322	45527322	NM_001872	CPB2
chr13	100900966	100904966	NM_004791	ITGBL1
chr13	98949728	98953728	NM_004800	TM9SF2
chr13	79806112	79810112	NM_005842	SPRY2
chr13	28129140	28133140	NM_015932	POMP
chr13	72198042	72202042	NM_024808	BORA
chr13	114096066	114100066	NM_032436	CHAMP1
chr13	99978418	99982418	NM_033110	A2LD1
chr13	98649163	98653163	NM_177967	UBAC2
chr13	30670111	30674111	NM_194318	B3GALTL
chr14	18621364	18625364	NM_001005356	POTEG
chr14	49118039	49122039	NM_001032	RPS29
chr14	103619775	103623775	NM_001080464	ASPG
chr14	49159641	49163641	NM_001083908	DNAAF2
chr14	64039044	64043044	NM_001123329	ZBTB1
chr14	105026630	105030630	NM_001134875	C14orf80
chr14	105026630	105030630	NM_001134876	C14orf80
chr14	105025564	105029564	NM_001134877	C14orf80
chr14	19248902	19252902	NM_001197287	OR11H2
chr14	105025236	105029236	NM_001198983	C14orf80
chr14	105022301	105026301	NM_001311	CRIP1
chr14	23608595	23612595	NM_006032	CPNE6
chr14	75056536	75060536	NM_006399	BATF
chr14	104288514	104292514	NM_006427	SIVA1
chr14	76295987	76299987	NM_014909	VASH1
chr14	64039044	64043044	NM_014950	ZBTB1
chr14	50509730	50513730	NM_015163	TRIM9
chr14	103672812	103676812	NM_015656	KIF26A
chr14	49159641	49163641	NM_018139	DNAAF2
chr14	104288514	104292514	NM_021709	SIVA1
chr14	35363347	35367347	NM_032352	BRMS1L
chr14	88128482	88132482	NM_207662	ZC3H14
chr15	72415155	72419155	NM_000781	CYP11A1
chr15	19881836	19885836	NM_001005241	OR4N4
chr15	88576490	88580490	NM_001013657	GDPGP1
chr15	72415155	72419155	NM_001099773	CYP11A1
chr15	67391795	67395795	NM_001104554	PAQR5
chr15	34657103	34661103	NM_001130010	C15orf41
chr15	76342043	76346043	NM_001130182	DNAJA4
chr15	76343614	76347614	NM_001130183	DNAJA4
chr15	49829049	49833049	NM_001142885	TMOD2
chr15	66693932	66697932	NM_001190456	CORO2B
chr15	38238501	38242501	NM_001211	BUB1B
chr15	82630245	82634245	NM_001243531	LOC100505679
chr15	76417720	76421720	NM_004378	CRABP1
chr15	71397252	71401252	NM_005477	HCN4
chr15	72003841	72007841	NM_005576	LOXL1
chr15	49829049	49833049	NM_014548	TMOD2
chr15	38518702	38522702	NM_014952	BAHD1
chr15	29404374	29408374	NM_015995	KLF13
chr15	76341541	76345541	NM_018602	DNAJA4
chr15	38435725	38439725	NM_033510	DISP2
chr15	37677523	37681523	NM_152597	FSIP1
chr16	622429	626429	NM_001040160	C16orf13
chr16	622429	626429	NM_001040161	C16orf13
chr16	622429	626429	NM_001040162	C16orf13
chr16	622429	626429	NM_001040165	C16orf13
chr16	48742329	48746329	NM_001040284	PAPD5
chr16	48742329	48746329	NM_001040285	PAPD5
chr16	56209410	56213410	NM_001145770	GPR56
chr16	10743198	10747198	NM_002484	NUBP1
chr16	1950062	1954062	NM_002952	RPS2
chr16	56209410	56213410	NM_005682	GPR56
chr16	88515187	88519187	NM_006086	TUBB3
chr16	14936800	14940800	NM_006985	NPIP
chr16	3192247	3196247	NM_012360	OR1F1
chr16	27344079	27348079	NM_021798	IL21R
chr16	2840728	2844728	NM_022119	PRSS22
chr16	622429	626429	NM_032366	C16orf13
chr16	619012	623012	NM_053284	WFIKKN1
chr17	53700215	53704215	NM_000250	MPO
chr17	39679283	39683283	NM_000342	SLC4A1
chr17	39803075	39807075	NM_000419	ITGA2B
chr17	35095918	35099918	NM_001005862	ERBB2
chr17	27699269	27703269	NM_001032293	ZNF207
chr17	19928926	19932926	NM_001033553	SPECC1
chr17	41987935	41991935	NM_001039083	ARL17B
chr17	18477566	18481566	NM_001039397	TBC1D28
chr17	37965617	37969617	NM_001042529	COASY
chr17	37965617	37969617	NM_001042532	COASY
chr17	1904353	1908353	NM_001098202	HIC1
chr17	27699269	27703269	NM_001098507	ZNF207
chr17	41325541	41329541	NM_001123066	MAPT
chr17	41325541	41329541	NM_001123067	MAPT
chr17	4346877	4350877	NM_001124758	SPNS2
chr17	68840117	68844117	NM_001144952	SDK2
chr17	24073492	24077492	NM_001160407	TLCD1
chr17	7101945	7105945	NM_001185022	CLDN7
chr17	7101945	7105945	NM_001185023	CLDN7
chr17	35470593	35474593	NM_001190918	THRA
chr17	35469971	35473971	NM_001190919	THRA
chr17	41325541	41329541	NM_001203251	MAPT
chr17	41325541	41329541	NM_001203252	MAPT
chr17	19185075	19189075	NM_001243473	B9D1
chr17	1907882	1911882	NM_001256827	SMG6
chr17	1907882	1911882	NM_001256828	SMG6
chr17	7101945	7105945	NM_001307	CLDN7
chr17	39776016	39780016	NM_002087	GRN
chr17	40190093	40194093	NM_002390	ADAM11
chr17	61727387	61731387	NM_002737	PRKCA
chr17	35470593	35474593	NM_003250	THRA
chr17	27699269	27703269	NM_003457	ZNF207
chr17	73862456	73866456	NM_003955	SOCS3
chr17	58979553	58983553	NM_005828	DCAF7
chr17	41325541	41329541	NM_005910	MAPT
chr17	42021350	42025350	NM_006178	NSF
chr17	19185075	19189075	NM_015681	B9D1
chr17	41325541	41329541	NM_016834	MAPT
chr17	41325541	41329541	NM_016835	MAPT
chr17	41325541	41329541	NM_016841	MAPT
chr17	1907882	1911882	NM_017575	SMG6
chr17	37965617	37969617	NM_025233	COASY
chr17	15145853	15149853	NM_031898	TEKT3
chr17	71779724	71783724	NM_032134	QRICH2
chr17	35883605	35887605	NM_032865	TNS4
chr17	24073492	24077492	NM_138463	TLCD1
chr17	21126560	21130560	NM_145109	MAP2K3
chr17	19928926	19932926	NM_152904	SPECC1
chr17	35470593	35474593	NM_199334	THRA
chr18	45266848	45270848	NM_000985	RPL17
chr18	45266848	45270848	NM_001035006	RPL17
chr18	645603	649603	NM_001071	TYMS
chr18	42794728	42798728	NM_001100817	TCEB3CL
chr18	42806570	42810570	NM_001100817	TCEB3CL
chr18	54037733	54041733	NM_001144966	NEDD4L
chr18	45266848	45270848	NM_001199340	RPL17
chr18	45266848	45270848	NM_001199341	RPL17
chr18	45266848	45270848	NM_001199342	RPL17
chr18	45266848	45270848	NM_001199343	RPL17
chr18	45266848	45270848	NM_001199344	RPL17
chr18	45266848	45270848	NM_001199345	RPL17
chr18	42794728	42798728	NM_001242907	LOC100506888
chr18	10513872	10517872	NM_003826	NAPG
chr18	709591	713591	NM_005433	YES1
chr18	65679172	65683172	NM_006566	CD226
chr18	72663103	72667103	NM_007345	ZNF236
chr18	42806570	42810570	NM_145653	TCEB3C
chr18	5942704	5946704	NM_173464	L3MBTL4
chr18	3400071	3404071	NM_174886	TGIF1
chr19	50098878	50102878	NM_000041	APOE
chr19	54158377	54162377	NM_000146	FTL
chr19	46071183	46075183	NM_000764	CYP2A7
chr19	17829730	17833730	NM_000980	RPL18A
chr19	1190748	1194748	NM_001001975	ATP5D
chr19	9220719	9224719	NM_001079935	OR7E24
chr19	39353191	39357191	NM_001114093	LSM14A
chr19	63568801	63572801	NM_001129730	ZNF837
chr19	10623936	10627936	NM_001137673	ILF3
chr19	63285020	63289020	NM_001145542	ZSCAN18
chr19	63285020	63289020	NM_001145543	ZSCAN18
chr19	63285020	63289020	NM_001145544	ZSCAN18
chr19	54161193	54165193	NM_001161587	GYS1
chr19	55122211	55126211	NM_001193646	ATF5
chr19	22259091	22263091	NM_001242680	ZNF729
chr19	1190748	1194748	NM_001687	ATP5D
chr19	801290	805290	NM_001972	ELANE
chr19	54161193	54165193	NM_002103	GYS1
chr19	46949237	46953237	NM_002483	CEACAM6
chr19	55916416	55920416	NM_002975	CLEC11A
chr19	10623936	10627936	NM_004516	ILF3
chr19	15585028	15589028	NM_007253	CYP4F8
chr19	55121770	55125770	NM_012068	ATF5
chr19	18582681	18586681	NM_012109	TMEM59L
chr19	10623936	10627936	NM_012218	ILF3
chr19	60033985	60037985	NM_012314	KIR2DS4
chr19	60017704	60021704	NM_013289	KIR3DL1
chr19	15349858	15353858	NM_014371	AKAP8L
chr19	39353191	39357191	NM_015578	LSM14A
chr19	10623936	10627936	NM_017620	ILF3
chr19	63285020	63289020	NM_023926	ZSCAN18
chr19	46071183	46075183	NM_030589	CYP2A7
chr19	59105802	59109802	NM_031896	CACNG7
chr19	63568801	63572801	NM_138466	ZNF837
chr19	10623936	10627936	NM_153464	ILF3
chr19	60909609	60913609	NM_176820	NLRP9
chr19	63528196	63532196	NM_181846	ZSCAN22
chr2	167451242	167455242	NM_001079810	XIRP2
chr2	109110428	109114428	NM_001099289	SH3RF3
chr2	216983717	216987717	NM_001127207	SMARCAL1
chr2	98600000	98604000	NM_001160154	MGAT4A
chr2	43852681	43856681	NM_001193464	DYNC2LI1
chr2	167451242	167455242	NM_001199143	XIRP2
chr2	61903486	61907486	NM_001201543	FAM161A
chr2	225041110	225045110	NM_001257197	CUL3
chr2	225041110	225045110	NM_001257198	CUL3
chr2	74633019	74637019	NM_001381	DOK1
chr2	225041110	225045110	NM_003590	CUL3
chr2	102167864	102171864	NM_003854	IL1RL2
chr2	215882923	215886923	NM_004044	ATIC
chr2	113117904	113121904	NM_005415	SLC20A1
chr2	139141196	139145196	NM_007226	NXPH2
chr2	98600000	98604000	NM_012214	MGAT4A
chr2	216983381	216987381	NM_014140	SMARCAL1
chr2	96363210	96367210	NM_015341	NCAPH
chr2	43852681	43856681	NM_015522	DYNC2LI1
chr2	43852681	43856681	NM_016008	DYNC2LI1
chr2	61903486	61907486	NM_032180	FAM161A
chr2	130810285	130814285	NM_032357	CCDC115
chr2	183695327	183699327	NM_138285	NUP35
chr2	167451242	167455242	NM_152381	XIRP2
chr2	203809408	203813408	NM_177538	CYP20A1
chr20	29920165	29924165	NM_001008409	TTLL9
chr20	36641251	36645251	NM_001018082	ADIG
chr20	22962056	22966056	NM_001052	SSTR4
chr20	30407807	30411807	NM_001164603	ASXL1
chr20	42811858	42815858	NM_001205317	RIMS4
chr20	47419911	47423911	NM_004975	KCNB1
chr20	30407807	30411807	NM_015338	ASXL1
chr20	30257356	30261356	NM_015352	POFUT1
chr20	61836421	61840421	NM_017806	LIME1
chr20	61839654	61843654	NM_020062	SLC2A4RG
chr20	36093361	36097361	NM_021215	RPRD1B
chr20	31057067	31061067	NM_025227	BPIFB2
chr20	686723	690723	NM_033409	SLC52A3
chr20	57610997	57614997	NM_080672	PHACTR3
chr20	30257356	30261356	NM_172236	POFUT1
chr20	58062374	58066374	NM_173644	C20orf197
chr20	42811858	42815858	NM_182970	RIMS4
chr21	37916656	37920656	NM_002240	KCNJ6
chr21	33835219	33839219	NM_032195	SON
chr21	33835219	33839219	NM_138927	SON
chr21	30890875	30894875	NM_181604	KRTAP6-2
chr21	44908533	44912533	NM_181684	KRTAP12-2
chr22	22704138	22708138	NM_000853	GSTT1
chr22	23659207	23663207	NM_001001663	TMEM211
chr22	29009106	29013106	NM_001037666	GATSL3
chr22	49521517	49525517	NM_001097	ACR
chr22	22701116	22705116	NM_001144931	LOC391322
chr22	49042268	49046268	NM_002751	MAPK11
chr22	21815512	21819512	NM_004914	RAB36
chr22	18606937	18610937	NM_023004	RTN4R
chr3	49367612	49371612	NM_000581	GPX1
chr3	53502070	53506070	NM_000720	CACNA1D
chr3	185440810	185444810	NM_001006941	ALG3
chr3	198958820	198962820	NM_001011537	FYTTD1
chr3	53502070	53506070	NM_001128839	CACNA1D
chr3	53502070	53506070	NM_001128840	CACNA1D
chr3	49950480	49954480	NM_001167582	RBM6
chr3	155319481	155323481	NM_001251962	ARHGEF26
chr3	155319838	155323838	NM_001251963	ARHGEF26
chr3	49369582	49373582	NM_001664	RHOA
chr3	150063732	150067732	NM_001870	CPA3
chr3	187988375	187992375	NM_002916	RFC4
chr3	49950480	49954480	NM_005777	RBM6
chr3	185440810	185444810	NM_005787	ALG3
chr3	48929284	48933284	NM_006321	ARIH2
chr3	50361300	50365300	NM_007022	CYB561D2
chr3	155319838	155323838	NM_015595	ARHGEF26
chr3	49017640	49021640	NM_018031	WDR6
chr3	48461221	48465221	NM_032166	ATRIP
chr3	198959020	198963020	NM_032288	FYTTD1
chr3	48461221	48465221	NM_130384	ATRIP
chr3	184686012	184690012	NM_130446	KLHL6
chr3	58592709	58596709	NM_138805	FAM3D
chr3	141877555	141881555	NM_152616	TRIM42
chr3	192527567	192531567	NM_174908	CCDC50
chr3	192527567	192531567	NM_178335	CCDC50
chr3	187988375	187992375	NM_181573	RFC4
chr3	49367612	49371612	NM_201397	GPX1
chr4	1762836	1766836	NM_000142	FGFR3
chr4	172969149	172973149	NM_001034845	GALNTL6
chr4	9053357	9057357	NM_001040448	DEFB131
chr4	69994781	69998781	NM_001074	UGT2B7
chr4	146272251	146276251	NM_001102653	OTUD4
chr4	103389220	103393220	NM_001135147	SLC39A8
chr4	141482046	141486046	NM_001153446	SCOC
chr4	141482064	141486064	NM_001153585	SCOC
chr4	141482046	141486046	NM_001153635	SCOC
chr4	141482064	141486064	NM_001153690	SCOC
chr4	1762836	1766836	NM_001163213	FGFR3
chr4	40504800	40508800	NM_001166050	APBB2
chr4	40504800	40508800	NM_001166051	APBB2
chr4	40504800	40508800	NM_001166052	APBB2
chr4	40504800	40508800	NM_001166053	APBB2
chr4	40504800	40508800	NM_001166054	APBB2
chr4	3454068	3458068	NM_001256896	DOK7
chr4	119418640	119422640	NM_003619	PRSS12
chr4	40504800	40508800	NM_004307	APBB2
chr4	39135059	39139059	NM_006859	LIAS
chr4	85807716	85811716	NM_014991	WDFY3
chr4	164633122	164637122	NM_018352	TMA16
chr4	1762836	1766836	NM_022965	FGFR3
chr4	24921493	24925493	NM_024936	ZCCHC4
chr4	40504800	40508800	NM_173075	APBB2
chr4	39135059	39139059	NM_194451	LIAS
chr5	81602894	81606894	NM_001025	RPS23
chr5	127445381	127449381	NM_001046	SLC12A2
chr5	7881490	7885490	NM_001089584	C5orf49
chr5	137299540	137303540	NM_001101800	FAM13B
chr5	137299540	137303540	NM_001101801	FAM13B
chr5	133477196	133481196	NM_001134851	TCF7
chr5	142128475	142132475	NM_001135608	ARHGAP26
chr5	114940237	114944237	NM_001164468	TMED7-TICAM2
chr5	114940237	114944237	NM_001164469	TMED7-TICAM2
chr5	135574897	135578897	NM_001167576	TRPC7
chr5	135574897	135578897	NM_001167577	TRPC7
chr5	138635339	138639339	NM_001194954	MATR3
chr5	126138743	126142743	NM_001198557	LMNB1
chr5	127445381	127449381	NM_001256461	SLC12A2
chr5	149524536	149528536	NM_001804	CDX1
chr5	176444526	176448526	NM_002011	FGFR4
chr5	133476300	133480300	NM_003202	TCF7
chr5	172341368	172345368	NM_003945	ATP6V0E1
chr5	168994828	168998828	NM_004946	DOCK2
chr5	142128475	142132475	NM_015071	ARHGAP26
chr5	74841412	74845412	NM_016218	POLK
chr5	137299540	137303540	NM_016603	FAM13B
chr5	23541480	23545480	NM_020227	PRDM9
chr5	135574897	135578897	NM_020389	TRPC7
chr5	114940237	114944237	NM_021649	TICAM2
chr5	138758354	138762354	NM_194296	SPATA24
chr5	138635339	138639339	NM_199189	MATR3
chr5	133477196	133481196	NM_201632	TCF7
chr5	133477196	133481196	NM_201634	TCF7
chr5	176444526	176448526	NM_213647	FGFR4
chr5	133477196	133481196	NM_213648	TCF7
chr6	125515118	125519118	NM_001003395	TPD52L1
chr6	125514577	125518577	NM_001003396	TPD52L1
chr6	125514577	125518577	NM_001003397	TPD52L1
chr6	54817527	54821527	NM_001010872	FAM83B
chr6	43843923	43847923	NM_001025366	VEGFA
chr6	43843923	43847923	NM_001025367	VEGFA
chr6	43843923	43847923	NM_001025368	VEGFA
chr6	43843923	43847923	NM_001025369	VEGFA
chr6	43843923	43847923	NM_001025370	VEGFA
chr6	43843923	43847923	NM_001033756	VEGFA
chr6	139156940	139160940	NM_001077706	ECT2L
chr6	43843923	43847923	NM_001171622	VEGFA
chr6	43843923	43847923	NM_001171623	VEGFA
chr6	43843923	43847923	NM_001171624	VEGFA
chr6	43843923	43847923	NM_001171625	VEGFA
chr6	43843923	43847923	NM_001171626	VEGFA
chr6	43843923	43847923	NM_001171627	VEGFA
chr6	43843923	43847923	NM_001171628	VEGFA
chr6	43843923	43847923	NM_001171629	VEGFA
chr6	43843923	43847923	NM_001171630	VEGFA
chr6	31238092	31242092	NM_001173531	POU5F1
chr6	139156940	139160940	NM_001195037	ECT2L
chr6	32227753	32231753	NM_001204103	PPT2
chr6	43843923	43847923	NM_001204384	VEGFA
chr6	43843923	43847923	NM_001204385	VEGFA
chr6	150249924	150253924	NM_001243327	RAET1E
chr6	150244203	150248203	NM_001243328	RAET1E
chr6	24881137	24885137	NM_001251989	GMNN
chr6	24881137	24885137	NM_001251990	GMNN
chr6	24881619	24885619	NM_001251991	GMNN
chr6	1567033	1571033	NM_001253846	GMDS
chr6	74280193	74284193	NM_001402	EEF1A1
chr6	1567033	1571033	NM_001500	GMDS
chr6	52157143	52161143	NM_002190	IL17A
chr6	31238092	31242092	NM_002701	POU5F1
chr6	125514577	125518577	NM_003287	TPD52L1
chr6	43843923	43847923	NM_003376	VEGFA
chr6	32227753	32231753	NM_005155	PPT2
chr6	43371975	43375975	NM_006672	SLC22A7
chr6	31184978	31188978	NM_014070	C6orf15
chr6	24881137	24885137	NM_015895	GMNN
chr6	27220886	27224886	NM_080596	HIST1H2AH
chr6	32227206	32231206	NM_138717	PPT2
chr6	35288167	35292167	NM_152753	SCUBE3
chr6	43371975	43375975	NM_153320	SLC22A7
chr6	31238092	31242092	NM_203289	POU5F1
chr7	94870109	94874109	NM_000305	PON2
chr7	64086167	64090167	NM_001007253	ERV3-1
chr7	94870109	94874109	NM_001018161	PON2
chr7	102005167	102009167	NM_001079877	RASA4
chr7	133882388	133886388	NM_001080538	AKR1B15
chr7	127775614	127779614	NM_001114726	PRRT4
chr7	139800451	139804451	NM_001145125	MKRN1
chr7	127775614	127779614	NM_001174164	PRRT4
chr7	30925439	30929439	NM_001185060	AQP1
chr7	30925629	30929629	NM_001185061	AQP1
chr7	30925643	30929643	NM_001185062	AQP1
chr7	83423594	83427594	NM_006080	SEMA3A
chr7	16796788	16800788	NM_006408	AGR2
chr7	102005167	102009167	NM_006989	RASA4
chr7	139797308	139801308	NM_013446	MKRN1
chr7	145442385	145446385	NM_014141	CNTNAP2
chr7	150338229	150342229	NM_173681	ATG9B
chr8	145983957	145987957	NM_000973	RPL8
chr8	7338777	7342777	NM_001037668	DEFB107A
chr8	7338777	7342777	NM_001040705	DEFB107B
chr8	118029692	118033692	NM_001172811	SLC30A8
chr8	118030370	118034370	NM_001172813	SLC30A8
chr8	118030370	118034370	NM_001172815	SLC30A8
chr8	80683603	80687603	NM_001199214	STMN2
chr8	143861299	143865299	NM_003695	LY6D
chr8	80683603	80687603	NM_007029	STMN2
chr8	67501816	67505816	NM_015169	RRS1
chr8	145454863	145458863	NM_015201	BOP1
chr8	145983957	145987957	NM_033301	RPL8
chr8	7304196	7308196	NM_058203	SPAG11B
chr8	67505271	67509271	NM_144650	ADHFE1
chr8	101652287	101656287	NM_152628	SNX31
chr9	103220662	103224662	NM_000035	ALDOB
chr9	139243029	139247029	NM_001177316	SLC34A3
chr9	139243029	139247029	NM_001177317	SLC34A3
chr9	33738463	33742463	NM_001197097	PRSS3
chr9	33738818	33742818	NM_001197098	PRSS3
chr9	85045724	85049724	NM_001244959	FRMD3
chr9	85047358	85051358	NM_001244960	FRMD3
chr9	85045724	85049724	NM_001244961	FRMD3
chr9	85045724	85049724	NM_001244962	FRMD3
chr9	130490074	130494074	NM_001248001	SET
chr9	89528793	89532793	NM_001257971	CTSL1
chr9	89528793	89532793	NM_001257972	CTSL1
chr9	89528793	89532793	NM_001257973	CTSL1
chr9	115860228	115864228	NM_001633	AMBP
chr9	89528793	89532793	NM_001912	CTSL1
chr9	130489329	130493329	NM_003011	SET
chr9	139042446	139046446	NM_004479	FUT7
chr9	33738463	33742463	NM_007343	PRSS3
chr9	114965620	114969620	NM_015258	FKBP15
chr9	115263829	115267829	NM_017790	RGS3
chr9	139243205	139247205	NM_080877	SLC34A3
chr9	89528793	89532793	NM_145918	CTSL1
chr9	138495767	138499767	NM_152571	C9orf163
chr9	85047358	85051358	NM_174938	FRMD3
chr9	34240377	34244377	NM_194313	KIF24
chr9	113127583	113131583	NM_205859	OR2K2
