# Supplementary material for: Genome-Wide Methylome Analyses Reveal Novel Epigenetic Regulation Patterns in Schizophrenia and Bipolar Disorder
Source: Biomed Res Int. 2015 Feb 4;2015:201587. doi: 10.1155/2015/201587 (PMC4334857; doi:10.1155/2015/201587)
Supplement: Supplementary file 1 — Supplemental Figure S1: The DNA methylation landscape of bipolar disease. Supplemental Figure S2: Genomic distribution of DMRs in bipolar disease. Supplemental Figure S3: Ultra DMRs are associated with gene- and CGI-related regions. Supplemental Figure S4: Ultra DMRs are associated with gene- and CGI-related regions in BP. Supplemental Figure S5: Ultra DMRs are associated with gene- and CGI-related regions in SZ. Supplemental Figure S6: Ultra DMRs are associated with long CGIs and HCPs. Supplemental Figure S7: Common genes aberrant methylated in SZs and BPs. Supplementary Table 1:The hypermethylated and hypomethylated promoters in SZs. Supplementary Table 2:The Specific hypermethylated and hypomethylated promoters with distinct patterns in SZs. Supplementary Table 3: The hypermethylated and hypomethylated promoters in BPs. Supplementary Table 4: KEGG pathways enriched by aberrant methylated genes specifically in SZs/normal. Supplementary Table 5: KEGG pathways enriched by aberrant methylated genes in BPs. Supplementary Table 6: Aberrant hypermethylated HCP genes in SZs. [file 201587.f1.zip › Supplementary Table 3.xls]

## Sheet: Sheet1
Supplementary Table 3. The hypermethylated and hypomethylated promoters in BPs.
Hypermethylated
ID	Refseq	chr	start	end	gene symbol
1	NM_001007255	1	159332804	159336804	KLHDC9
2	NM_001007257	1	13946462	13950462	PRDM2
3	NM_001007544	1	204403494	204407494	C1orf186
4	NM_001134939	1	150000068	150004068	OAZ3
5	NM_001164825	1	35086549	35090549	C1orf212
6	NM_001170631	1	205195934	205199934	FCAMR
7	NM_016126	1	54157821	54161821	HSPB11
8	NM_016486	1	45924433	45928433	TMEM69
9	NM_024746	1	220760224	220764224	HHIPL2
10	NM_139118	1	153893856	153897856	YY1AP1
11	NM_139119	1	153893856	153897856	YY1AP1
12	NM_139121	1	153893856	153897856	YY1AP1
13	NM_170706	1	181481994	181485994	NMNAT2
14	NM_001077685	10	51132167	51136167	AGAP7
15	NM_001077686	10	50892693	50896693	AGAP8
16	NM_176792	10	102725568	102729568	MRPL43
17	NM_000695	11	67184208	67188208	ALDH3B2
18	NM_001007027	11	77487635	77491635	ALG8
19	NM_024783	11	47635718	47639718	AGBL2
20	NM_032127	11	6187139	6191139	FAM160A2
21	NM_032193	11	65239719	65243719	RNASEH2C
22	NM_033101	11	63028099	63032099	LGALS12
23	NM_170722	11	118542649	118546649	NLRX1
24	NM_001129841	12	2030676	2034676	CACNA1C
25	NM_016817	12	111898656	111902656	OAS2
26	NM_017612	12	121520098	121524098	ZCCHC8
27	NM_023925	12	30751752	30755752	CAPRIN2
28	NM_023928	12	124113877	124117877	AACS
29	NM_024056	12	46641596	46645596	TMEM106C
30	NM_024057	12	100990102	100994102	NUP37
31	NM_001164399	14	59039537	59043537	C14orf38
32	NM_001198592	14	23855394	23859394	ADCY4
33	NM_001256681	14	34659508	34663508	KIAA0391
34	NM_002013	14	44652551	44656551	FKBP3
35	NM_002028	14	64521259	64525259	FNTB
36	NM_004500	14	20745135	20749135	HNRNPC
37	NM_004713	14	49318281	49322281	NEMF
38	NM_004755	14	90404922	90408922	RPS6KA5
39	NM_152444	14	73386373	73390373	PTGR2
40	NM_001142451	16	28891596	28895596	SPNS1
41	NM_016310	16	34978	38978	POLR3K
42	NM_016326	16	65141966	65145966	CKLF
43	NM_016332	16	1926234	1930234	MSRB1
44	NM_016948	16	66250351	66254351	PARD6A
45	NM_001199775	17	25729621	25733621	CPD
46	NM_001199898	17	45525099	45529099	PDK2
47	NM_001251888	17	77526714	77530714	ASPSCR1
48	NM_001251902	17	7223016	7227016	TNK1
49	NM_001256330	17	45991427	45995427	CACNA1G
50	NM_003857	17	71580486	71584486	GALR2
51	NM_203411	17	7697108	7701108	TMEM88
52	NM_001198943	18	30649923	30653923	DTNA
53	NM_000363	19	60352947	60356947	TNNI3
54	NM_001136191	19	11133942	11137942	KANK2
55	NM_001506	19	55963669	55967669	GPR32
56	NM_012254	19	63699511	63703511	SLC27A5
57	NM_012267	19	60463402	60467402	HSPBP1
58	NM_017636	19	54350827	54354827	TRPM4
59	NM_017652	19	62970831	62974831	ZNF586
60	NM_033363	19	44111433	44115433	MRPS12
61	NM_000993	2	100983122	100987122	RPL31
62	NM_016815	2	127127980	127131980	GYPC
63	NM_018221	2	74234718	74238718	MOB1A
64	NM_173205	2	113387240	113391240	IL37
65	NM_020062	20	61839654	61843654	SLC2A4RG
66	NM_182658	20	31104890	31108890	BPIFB3
67	NM_182676	20	43958665	43962665	PLTP
68	NM_058190	21	45182382	45186382	FAM207A
69	NM_080794	21	25877838	25881838	MRPL39
70	NM_182482	21	10040712	10044712	BAGE2
71	NM_182484	21	10040712	10044712	BAGE5
72	NM_000878	22	35849825	35853825	IL2RB
73	NM_015367	22	16499484	16503484	BCL2L13
74	NM_017829	22	15996409	16000409	CECR5
75	NM_017911	22	44082448	44086448	FAM118A
76	NM_001007073	3	12849443	12853443	RPL32
77	NM_001085357	3	113663502	113667502	BTLA
78	NM_001197109	3	161038343	161042343	SCHIP1
79	NM_002045	3	116822840	116826840	GAP43
80	NM_002718	3	137165204	137169204	PPP2R3A
81	NM_003412	3	148607870	148611870	ZIC1
82	NM_003418	3	130367347	130371347	CNBP
83	NM_016821	3	9764627	9768627	OGG1
84	NM_001256862	4	8938734	8942734	LOC100287478
85	NM_001256862	4	8943481	8947481	LOC100287478
86	NM_001256862	4	8938734	8942734	LOC100287478
87	NM_001256862	4	8943481	8947481	LOC100287478
88	NM_001256862	4	8938734	8942734	LOC100287478
89	NM_001256862	4	8943481	8947481	LOC100287478
90	NM_001256862	4	8938734	8942734	LOC100287478
91	NM_001256862	4	8943481	8947481	LOC100287478
92	NM_001256862	4	8938734	8942734	LOC100287478
93	NM_001256862	4	8943481	8947481	LOC100287478
94	NM_001256862	4	8938734	8942734	LOC100287478
95	NM_001256862	4	8943481	8947481	LOC100287478
96	NM_001256862	4	8938734	8942734	LOC100287478
97	NM_001256862	4	8943481	8947481	LOC100287478
98	NM_001256862	4	8938734	8942734	LOC100287478
99	NM_001256862	4	8943481	8947481	LOC100287478
100	NM_001001669	5	148939327	148943327	ARHGEF37
101	NM_001002796	5	94066046	94070046	MCTP1
102	NM_001003841	5	1252709	1256709	SLC6A19
103	NM_004828	6	41409505	41413505	NCR2
104	NM_016377	6	131496518	131500518	AKAP7
105	NM_021813	6	90690967	90694967	BACH2
106	NM_031924	6	159316253	159320253	RSPH3
107	NM_033177	6	31734984	31738984	GPANK1
108	NM_033181	6	88904303	88908303	CNR1
109	NM_001220	7	44221273	44225273	CAMK2B
110	NM_001233	7	115924890	115928890	CAV2
111	NM_001242452	7	128363229	128367229	IRF5
112	NM_001242713	7	101789027	101793027	LOC100289561
113	NM_021908	7	116378616	116382616	ST7
114	NM_033224	7	44880416	44884416	PURB
115	NM_145268	7	129632939	129636939	C7orf45
116	NM_145292	7	151282396	151286396	GALNTL5
117	NM_001199214	8	80683603	80687603	STMN2
118	NM_001205263	8	95451363	95455363	RAD54B
119	NM_001205266	8	7257794	7261794	DEFB4B
120	NM_001258433	8	134316595	134320595	NDRG1
121	NM_005144	8	22025876	22029876	HR
122	NM_000144	9	70838298	70842298	FXN
123	NM_000155	9	34634585	34638585	GALT
124	NM_014010	9	118225324	118229324	ASTN2
125	NM_014582	9	137575805	137579805	OBP2A
126	NM_020641	9	27272653	27276653	C9orf11
127	NM_153439	9	130256105	130260105	ODF2
128	NM_203453	9	4650297	4654297	PPAPDC2
129	NM_203468	9	139060371	139064371	ENTPD2
Hypomethylated
ID	Refseq	chr	start	end	gene symbol
1	NM_000069	1	199273262	199277262	CACNA1S
2	NM_001002275	1	159897528	159901528	FCGR2B
3	NM_001006605	1	93078304	93082304	FAM69A
4	NM_001006624	1	13782553	13786553	PDPN
5	NM_001006625	1	13782553	13786553	PDPN
6	NM_001006658	1	205692267	205696267	CR2
7	NM_001006665	1	26742929	26746929	RPS6KA1
8	NM_001039703	1	144002727	144006727	NBPF10
9	NM_001077704	1	67166513	67170513	MIER1
10	NM_001104548	1	207666790	207670790	MIR205HG
11	NM_001127325	1	11655123	11659123	MAD2L2
12	NM_001127593	1	159776174	159780174	FCGR3A
13	NM_001143890	1	32601291	32605291	BSDC1
14	NM_001924	1	67921447	67925447	GADD45A
15	NM_004872	1	54267936	54271936	TMEM59
16	NM_006912	1	154132222	154136222	RIT1
17	NM_006917	1	163634782	163638782	RXRG
18	NM_006934	1	44232741	44236741	SLC6A9
19	NM_015984	1	191246118	191250118	UCHL5
20	NM_016374	1	233394832	233398832	ARID4B
21	NM_016946	1	159229624	159233624	F11R
22	NM_017619	1	103839165	103843165	RNPC3
23	NM_020247	1	225192560	225196560	ADCK3
24	NM_020318	1	174696929	174700929	PAPPA2
25	NM_020335	1	158634987	158638987	VANGL2
26	NM_032027	1	61917306	61921306	TM2D1
27	NM_032174	1	159460456	159464456	TOMM40L
28	NM_080921	1	196872759	196876759	PTPRC
29	NM_133177	1	29433614	29437614	PTPRU
30	NM_138391	1	201241156	201245156	TMEM183A
31	NM_144622	1	153255626	153259626	DCST2
32	NM_152501	1	157165960	157169960	PYHIN1
33	NM_213651	1	108476969	108480969	SLC25A24
34	NM_001033858	10	14986876	14990876	DCLRE1C
35	NM_001173484	10	21106908	21110908	NEBL
36	NM_001184785	10	34436493	34440493	PARD3
37	NM_001202466	10	168423	172423	ZMYND11
38	NM_001243781	10	82156221	82160221	FAM213A
39	NM_001243782	10	82161554	82165554	FAM213A
40	NM_004725	10	124901749	124905749	BUB3
41	NM_004728	10	70383884	70387884	DDX21
42	NM_145312	10	43419860	43423860	ZNF485
43	NM_178815	10	18986318	18990318	ARL5B
44	NM_178832	10	99362299	99366299	MORN4
45	NM_181840	10	118944989	118948989	KCNK18
46	NM_212479	10	168423	172423	ZMYND11
47	NM_001005275	11	54889935	54893935	OR4A15
48	NM_001025239	11	830823	834823	TSPAN4
49	NM_001127226	11	33679131	33683131	CD59
50	NM_001134775	11	65779340	65783340	KLC2
51	NM_001166290	11	17361371	17365371	KCNJ11
52	NM_001194997	11	2976727	2980727	CARS
53	NM_001258418	11	109950968	109954968	ARHGAP20
54	NM_001360	11	70821104	70825104	DHCR7
55	NM_001612	11	125045438	125049438	ACRV1
56	NM_017516	11	107302486	107306486	RAB39A
57	NM_020470	11	65806626	65810626	YIF1A
58	NM_194285	11	18582523	18586523	SPTY2D1
59	NM_001146335	12	83775397	83779397	SLC6A15
60	NM_001146698	12	112742241	112746241	RBM19
61	NM_001146699	12	112736925	112740925	RBM19
62	NM_001173982	12	103372821	103376821	CHST11
63	NM_001174127	12	49657832	49661832	SLC11A2
64	NM_001199302	12	68921076	68925076	CNOT2
65	NM_001206977	12	99389681	99393681	NR1H4
66	NM_002595	12	95194169	95198169	CDK17
67	NM_006250	12	10922826	10926826	PRH1
68	NM_025140	12	122984907	122988907	CCDC92
69	NM_025198	12	105893198	105897198	MTERFD3
70	NM_057088	12	51467735	51471735	KRT3
71	NM_198900	12	48315990	48319990	FMNL3
72	NM_001017370	13	38508454	38512454	NHLRC3
73	NM_001040444	13	48966528	48970528	PHF11
74	NM_014305	13	94022308	94026308	TGDS
75	NM_033132	13	99411275	99415275	ZIC5
76	NM_001011713	14	56925023	56929023	NAA30
77	NM_001012264	14	20568818	20572818	RNASE13
78	NM_001029991	14	20525804	20529804	METTL17
79	NM_001193314	14	76960770	76964770	C14orf133
80	NM_001311	14	105022301	105026301	CRIP1
81	NM_006977	14	64021307	64025307	ZBTB25
82	NM_016586	14	35835514	35839514	MBIP
83	NM_001039841	15	28704170	28708170	ARHGAP11B
84	NM_001146096	15	28981367	28985367	FAN1
85	NM_182985	15	42813851	42817851	TRIM69
86	NM_001012991	16	19623174	19627174	C16orf88
87	NM_001024401	16	28209340	28213340	SBK1
88	NM_002761	16	11280193	11284193	PRM1
89	NM_004352	16	47867329	47871329	CBLN1
90	NM_004360	16	67326695	67330695	CDH1
91	NM_004380	16	3713056	3717056	CREBBP
92	NM_004413	16	88212500	88216500	DPEP1
93	NM_000250	17	53700215	53704215	MPO
94	NM_001033571	17	63753739	63757739	AMZ2
95	NM_001142622	17	37592630	37596630	GHDC
96	NM_003161	17	55323224	55327224	RPS6KB1
97	NM_022036	17	69937261	69941261	GPRC5C
98	NM_022059	17	4581576	4585576	CXCL16
99	NM_030976	17	36547210	36551210	KRTAP4-6
100	NM_052857	17	30310661	30314661	ZNF830
101	NM_080669	17	23743787	23747787	SLC46A1
102	NM_080677	17	53513778	53517778	DYNLL2
103	NM_133629	17	30448924	30452924	RAD51D
104	NM_139018	17	70200046	70204046	CD300LF
105	NM_198175	17	46583918	46587918	NME1
106	NM_198204	17	37970603	37974603	MLX
107	NM_000633	18	58939558	58943558	BCL2
108	NM_001024912	19	47701297	47705297	CEACAM1
109	NM_001077446	19	59384915	59388915	TSEN34
110	NM_001081639	19	59831719	59835719	LILRB1
111	NM_001348	19	3907451	3911451	DAPK3
112	NM_006630	19	49335549	49339549	ZNF234
113	NM_016553	19	55099893	55103893	NUP62
114	NM_023035	19	13176256	13180256	CACNA1A
115	NM_130787	19	54959991	54963991	AP2A1
116	NM_130807	19	2020034	2024034	MOB3A
117	NM_144686	19	59353645	59357645	TMC4
118	NM_173637	19	6375047	6379047	SLC25A41
119	NM_178526	19	19033802	19037802	SLC25A42
120	NM_178544	19	45192782	45196782	ZNF546
121	NM_001184937	2	120485073	120489073	EPB41L5
122	NM_003887	2	9262344	9266344	ASAP2
123	NM_004097	2	72996111	73000111	EMX1
124	NM_152515	2	113209914	113213914	CKAP2L
125	NM_170672	2	33512919	33516919	RASGRP3
126	NM_177968	2	44247503	44251503	PPM1B
127	NM_199204	2	169629790	169633790	DHRS9
128	NM_203346	2	241813354	241817354	HDLBP
129	NM_203437	2	64602942	64606942	AFTPH
130	NM_000744	20	61443105	61447105	CHRNA4
131	NM_001042353	20	760355	764355	FAM110A
132	NM_001136021	20	49434900	49438900	NFATC2
133	NM_001145315	20	34811607	34815607	DSN1
134	NM_002531	20	60808633	60812633	NTSR1
135	NM_002591	20	55567542	55571542	PCK1
136	NM_178457	20	57197469	57201469	ZNF831
137	NM_001001694	22	48773068	48777068	IL17REL
138	NM_001256525	22	19076404	19080404	ZNF74
139	NM_206955	22	21218122	21222122	PRAME
140	NM_001622	3	187811543	187815543	AHSG
141	NM_016589	3	120698057	120702057	TIMMDC1
142	NM_017819	3	102761401	102765401	RG9MTD1
143	NM_021935	3	71901495	71905495	PROK2
144	NM_183352	3	10315614	10319614	SEC13
145	NM_001040060	4	89113825	89117825	SPP1
146	NM_001085382	4	7480921	7484921	PSAPL1
147	NM_001134937	4	53936576	53940576	FIP1L1
148	NM_001256475	4	57089531	57093531	THEGL
149	NM_001261447	4	176789081	176793081	GPM6A
150	NM_018983	4	110954114	110958114	GAR1
151	NM_018986	4	8249959	8253959	SH3TC1
152	NM_031296	4	140592410	140596410	RAB33B
153	NM_139211	4	57206910	57210910	HOPX
154	NM_173463	4	24414836	24418836	CCDC149
155	NM_173468	4	71984920	71988920	MOB1B
156	NM_173487	4	130232278	130236278	C4orf33
157	NM_002084	5	150378191	150382191	GPX3
158	NM_003337	5	133732768	133736768	UBE2B
159	NM_016640	5	44842783	44846783	MRPS30
160	NM_016644	5	119825917	119829917	PRR16
161	NM_018343	5	96520326	96524326	RIOK2
162	NM_018356	5	31566129	31570129	C5orf22
163	NM_018924	5	140728145	140732145	PCDHGB3
164	NM_173489	5	41031878	41035878	HEATR7B2
165	NM_173490	5	72450143	72454143	TMEM171
166	NM_001007466	6	158651679	158655679	TULP4
167	NM_001080450	6	107491077	107495077	BEND3
168	NM_001168410	6	72981183	72985183	RIMS1
169	NM_001202521	6	30962443	30966443	DDR1
170	NM_002505	6	41146684	41150684	NFYA
171	NM_005495	6	25860905	25864905	SLC17A4
172	NM_006789	6	41126917	41130917	APOBEC2
173	NM_032511	6	99825513	99829513	FAXC
174	NM_032532	6	159508416	159512416	FNDC1
175	NM_001163474	7	148798816	148802816	ZNF746
176	NM_001199636	7	31056600	31060600	ADCYAP1R1
177	NM_001708	7	128197778	128201778	OPN1SW
178	NM_022307	7	8117339	8121339	ICA1
179	NM_022373	7	35636794	35640794	HERPUD2
180	NM_024033	7	134499071	134503071	C7orf49
181	NM_024051	7	30500761	30504761	GGCT
182	NM_152703	7	92595303	92599303	SAMD9L
183	NM_152749	7	105185871	105189871	ATXN7L1
184	NM_001172811	8	118029692	118033692	SLC30A8
185	NM_001172813	8	118030370	118034370	SLC30A8
186	NM_014112	8	116487899	116491899	TRPS1
187	NM_014237	8	39559243	39563243	ADAM18
188	NM_024721	8	77754069	77758069	ZFHX4
189	NM_031940	8	38963483	38967483	TM2D2
190	NM_153015	8	109862521	109866521	TMEM74
191	NM_153225	8	74137331	74141331	SBSPON
192	NM_153332	8	8895723	8899723	ERI1
193	NM_153692	8	38948824	38952824	HTRA4
194	NM_153704	8	94834247	94838247	TMEM67
195	NM_153831	8	141735662	141739662	PTK2
196	NM_001003936	9	112103687	112107687	TXNDC8
197	NM_001017969	9	5907007	5911007	KIAA2026
198	NM_004560	9	93522698	93526698	ROR2
199	NM_017881	9	76863935	76867935	NMRK1
