# Supplementary material for: Genome-Wide Methylome Analyses Reveal Novel Epigenetic Regulation Patterns in Schizophrenia and Bipolar Disorder
Source: Biomed Res Int. 2015 Feb 4;2015:201587. doi: 10.1155/2015/201587 (PMC4334857; doi:10.1155/2015/201587)
Supplement: Supplementary file 1 — Supplemental Figure S1: The DNA methylation landscape of bipolar disease. Supplemental Figure S2: Genomic distribution of DMRs in bipolar disease. Supplemental Figure S3: Ultra DMRs are associated with gene- and CGI-related regions. Supplemental Figure S4: Ultra DMRs are associated with gene- and CGI-related regions in BP. Supplemental Figure S5: Ultra DMRs are associated with gene- and CGI-related regions in SZ. Supplemental Figure S6: Ultra DMRs are associated with long CGIs and HCPs. Supplemental Figure S7: Common genes aberrant methylated in SZs and BPs. Supplementary Table 1:The hypermethylated and hypomethylated promoters in SZs. Supplementary Table 2:The Specific hypermethylated and hypomethylated promoters with distinct patterns in SZs. Supplementary Table 3: The hypermethylated and hypomethylated promoters in BPs. Supplementary Table 4: KEGG pathways enriched by aberrant methylated genes specifically in SZs/normal. Supplementary Table 5: KEGG pathways enriched by aberrant methylated genes in BPs. Supplementary Table 6: Aberrant hypermethylated HCP genes in SZs. [file 201587.f1.zip › Supplementary Table 4.xls]

## Sheet: Sheet1
Supplementary Table 4. KEGG pathways enriched by aberrant methylated genes specifically in SZs/normal.
hypermethylated genes enriched pathways:
pattern	pathways	number of genes	gene ids	adjusted p
island	Neuroactive ligand-receptor interaction	2	3350 153	0.0051
3'shore	Long-term potentiation	2	3710 6195	0.0006
3'shore	Oocyte meiosis	2	3710 6195	0.0008
5'shore	Jak-STAT signaling pathway	2	3570 3587	0.0092
5'shore	Systemic lupus erythematosus	2	8332 8367	0.0092
5'shore	Cytokine-cytokine receptor interaction	2	3570 3587	0.0171
overlap	Melanogenesis	2	1385 107	0.0033
overlap	Purine metabolism	2	5432 107	0.0036
overlap	Huntington's disease	2	5432 1385	0.0036
noisland	Olfactory transduction	3	390260 338675 219865	0.0356
hypomethylated genes enriched pathways:
pattern	pathways	number of genes	gene ids	adjusted p
shore3	Vibrio cholerae infection	2	375 6558	0.0008
overlap	Endocytosis	2	2261 2065	0.004
overlap	MAPK signaling pathway	2	2261 4137	0.004
noisland	Olfactory transduction	9	127069 390151 403239 390061 26648 1179 390275 283694 4992	6.5e-07
noisland	Drug metabolism - cytochrome P450	2	7364 1549	0.0196
noisland	Retinol metabolism	2	7364 1549	0.0196
noisland	Drug metabolism - other enzymes	2	7364 1549	0.0196
noisland	Cell adhesion molecules (CAMs)	2	10666 5818	0.0377
noisland	Natural killer cell mediated cytotoxicity	2	3811 135250	0.0377
noisland	Axon guidance	2	10371 64218	0.0377
