# Supplementary material for: Genome-Wide Methylome Analyses Reveal Novel Epigenetic Regulation Patterns in Schizophrenia and Bipolar Disorder
Source: Biomed Res Int. 2015 Feb 4;2015:201587. doi: 10.1155/2015/201587 (PMC4334857; doi:10.1155/2015/201587)
Supplement: Supplementary file 1 — Supplemental Figure S1: The DNA methylation landscape of bipolar disease. Supplemental Figure S2: Genomic distribution of DMRs in bipolar disease. Supplemental Figure S3: Ultra DMRs are associated with gene- and CGI-related regions. Supplemental Figure S4: Ultra DMRs are associated with gene- and CGI-related regions in BP. Supplemental Figure S5: Ultra DMRs are associated with gene- and CGI-related regions in SZ. Supplemental Figure S6: Ultra DMRs are associated with long CGIs and HCPs. Supplemental Figure S7: Common genes aberrant methylated in SZs and BPs. Supplementary Table 1:The hypermethylated and hypomethylated promoters in SZs. Supplementary Table 2:The Specific hypermethylated and hypomethylated promoters with distinct patterns in SZs. Supplementary Table 3: The hypermethylated and hypomethylated promoters in BPs. Supplementary Table 4: KEGG pathways enriched by aberrant methylated genes specifically in SZs/normal. Supplementary Table 5: KEGG pathways enriched by aberrant methylated genes in BPs. Supplementary Table 6: Aberrant hypermethylated HCP genes in SZs. [file 201587.f1.zip › Supplementary Table 5.xls]

## Sheet: Sheet1
Supplementary Table 5. KEGG pathways enriched by aberrant methylated genes in BPs.
hypomethylated genes enriched pathways:
Pathways	number of genes	gene ids	adjusted p
Fc gamma R-mediated phagocytosis	5	5788 6198 2213 8853 2214	adjP=0.0018
MAPK signaling pathway	7	4773 25780 779 1647 5495 6195 773	adjP=0.0022
B cell receptor signaling pathway	4	1380 4773 2213 25780	adjP=0.0029
Cell cycle	4	1387 1647 9184 10459	adjP=0.0172
Pathways in cancer	6	1387 6258 596 5747 999 1613	adjP=0.0172
Adherens junction	3	1387 999 56288	adjP=0.0251
Small cell lung cancer	3	6258 596 5747	adjP=0.0276
Thyroid cancer	2	6258 999	adjP=0.0312
Primary immunodeficiency	2	5788 64421	adjP=0.0401
hypermethylated genes enriched pathways:
Pathways	number of genes	gene ids	adjusted p
GnRH signaling pathway	3	196883 775 816	adjP=0.0096
Calcium signaling pathway	4	196883 775 8913 816	adjP=0.0096
Dilated cardiomyopathy	3	196883 7137 775	adjP=0.0096
Purine metabolism	3	196883 954 51728	adjP=0.0187
Type II diabetes mellitus	2	775 8913	adjP=0.0187
Hypertrophic cardiomyopathy (HCM)	2	7137 775	adjP=0.0281
Long-term potentiation	2	775 816	adjP=0.0281
Metabolic pathways	7	168391 10998 23057 51728 2592 222 79053	adjP=0.0281
Cardiac muscle contraction	2	7137 775	adjP=0.0281
Ribosome	2	6161 6160	adjP=0.0281
PPAR signaling pathway	2	10998 5360	adjP=0.0281
Melanogenesis	2	196883 816	adjP=0.0327
MAPK signaling pathway	3	775 9252 8913	adjP=0.0327
Oocyte meiosis	2	196883 816	adjP=0.0341
Vascular smooth muscle contraction	2	196883 775	adjP=0.0341
Neurotrophin signaling pathway	2	9252 816	adjP=0.0377
