# Supplementary material for: Genome-Wide Methylome Analyses Reveal Novel Epigenetic Regulation Patterns in Schizophrenia and Bipolar Disorder
Source: Biomed Res Int. 2015 Feb 4;2015:201587. doi: 10.1155/2015/201587 (PMC4334857; doi:10.1155/2015/201587)
Supplement: Supplementary file 1 — Supplemental Figure S1: The DNA methylation landscape of bipolar disease. Supplemental Figure S2: Genomic distribution of DMRs in bipolar disease. Supplemental Figure S3: Ultra DMRs are associated with gene- and CGI-related regions. Supplemental Figure S4: Ultra DMRs are associated with gene- and CGI-related regions in BP. Supplemental Figure S5: Ultra DMRs are associated with gene- and CGI-related regions in SZ. Supplemental Figure S6: Ultra DMRs are associated with long CGIs and HCPs. Supplemental Figure S7: Common genes aberrant methylated in SZs and BPs. Supplementary Table 1:The hypermethylated and hypomethylated promoters in SZs. Supplementary Table 2:The Specific hypermethylated and hypomethylated promoters with distinct patterns in SZs. Supplementary Table 3: The hypermethylated and hypomethylated promoters in BPs. Supplementary Table 4: KEGG pathways enriched by aberrant methylated genes specifically in SZs/normal. Supplementary Table 5: KEGG pathways enriched by aberrant methylated genes in BPs. Supplementary Table 6: Aberrant hypermethylated HCP genes in SZs. [file 201587.f1.zip › Supplementary Table 6.xls]

## Sheet: 查询1
Supplementary Table 6. Aberrant hypermethylated HCP genes in SZs.
Entrez gene id	Gene symbol	Description	CpG ratio
481	ATP1B1	ATPase, Na+/K+ transporting, beta 1 polypeptide	0.834
7984	ARHGEF5	Rho guanine nucleotide exchange factor (GEF) 5	0.6976
29803	REPIN1	replication initiator 1	0.2447
55672	NBPF1	neuroblastoma breakpoint family, member 1	0.7453
107	ADCY1	adenylate cyclase 1 (brain)	0.9574
143	PARP4	poly (ADP-ribose) polymerase family, member 4	0.7467
153	ADRB1	adrenergic, beta-1-, receptor	0.8057
378	ARF4	ADP-ribosylation factor 4	0.8865
663	BNIP2	BCL2/adenovirus E1B 19kDa interacting protein 2	0.9237
1033	CDKN3	cyclin-dependent kinase inhibitor 3	0.8548
1385	CREB1	cAMP responsive element binding protein 1	0.851
1690	COCH	coagulation factor C homolog, cochlin (Limulus polyphemus)	0.8057
1780	DYNC1I1	dynein, cytoplasmic 1, intermediate chain 1	0.7296
1960	EGR3	early growth response 3	0.7521
2558	GABRA5	gamma-aminobutyric acid (GABA) A receptor, alpha 5	0.737
2628	GATM	glycine amidinotransferase (L-arginine:glycine amidinotransferase)	0.9231
2650	GCNT1	glucosaminyl (N-acetyl) transferase 1, core 2	0.7824
2882	GPX7	glutathione peroxidase 7	0.8087
3009	HIST1H1B	histone cluster 1, H1b	0.5345
3350	HTR1A	5-hydroxytryptamine (serotonin) receptor 1A	0.5849
3398	ID2	inhibitor of DNA binding 2, dominant negative helix-loop-helix protein	0.7563
3587	IL10RA	interleukin 10 receptor, alpha	0.7047
3679	ITGA7	integrin, alpha 7	0.6105
3710	ITPR3	inositol 1,4,5-trisphosphate receptor, type 3	0.8146
3760	KCNJ3	potassium inwardly-rectifying channel, subfamily J, member 3	0.6881
3766	KCNJ10	potassium inwardly-rectifying channel, subfamily J, member 10	0.6398
3925	STMN1	stathmin 1	0.7332
4088	SMAD3	SMAD family member 3	0.9037
4147	MATN2	matrilin 2	0.6646
4521	NUDT1	nudix (nucleoside diphosphate linked moiety X)-type motif 1	0.7094
4741	NEFM	neurofilament, medium polypeptide	0.7818
4760	NEUROD1	neurogenic differentiation 1	0.7075
4861	NPAS1	neuronal PAS domain protein 1	0.6454
4863	NPAT	nuclear protein, ataxia-telangiectasia locus	0.8767
4899	NRF1	nuclear respiratory factor 1	0.8573
5049	PAFAH1B2	platelet-activating factor acetylhydrolase 1b, catalytic subunit 2 (30kDa)	0.7411
5307	PITX1	paired-like homeodomain 1	0.733
5432	POLR2C	polymerase (RNA) II (DNA directed) polypeptide C, 33kDa	0.626
5795	PTPRJ	protein tyrosine phosphatase, receptor type, J	0.8609
5925	RB1	retinoblastoma 1	0.9491
6138	RPL15	ribosomal protein L15	0.8316
6195	RPS6KA1	ribosomal protein S6 kinase, 90kDa, polypeptide 1	0.8252
6474	SHOX2	short stature homeobox 2	0.738
6530	SLC6A2	solute carrier family 6 (neurotransmitter transporter, noradrenalin), member 2	0.8196
6726	SRP9	signal recognition particle 9kDa	0.6468
6932	TCF7	transcription factor 7 (T-cell specific, HMG-box)	0.8772
7026	NR2F2	nuclear receptor subfamily 2, group F, member 2	0.9838
7050	TGIF1	TGFB-induced factor homeobox 1	0.7591
7337	UBE3A	ubiquitin protein ligase E3A	0.863
7538	ZFP36	zinc finger protein 36, C3H type, homolog (mouse)	0.6522
7716	VEZF1	vascular endothelial zinc finger 1	0.718
7743	ZNF189	zinc finger protein 189	0.6726
8038	ADAM12	ADAM metallopeptidase domain 12	0.9279
8332	HIST1H2AL	histone cluster 1, H2al	0.9253
8554	PIAS1	protein inhibitor of activated STAT, 1	0.82
9424	KCNK6	potassium channel, subfamily K, member 6	0.731
9480	ONECUT2	one cut homeobox 2	0.8503
9618	TRAF4	TNF receptor-associated factor 4	0.6562
9689	BZW1	basic leucine zipper and W2 domains 1	0.8058
9718	ECE2	endothelin converting enzyme 2	0.7197
9897	KIAA0196	KIAA0196	0.6643
10123	ARL4C	ADP-ribosylation factor-like 4C	0.8678
10434	LYPLA1	lysophospholipase I	0.8362
10516	FBLN5	fibulin 5	0.6497
10952	SEC61B	Sec61 beta subunit	0.8099
11065	UBE2C	ubiquitin-conjugating enzyme E2C	0.7723
11211	FZD10	frizzled family receptor 10	0.8521
11247	NXPH4	neurexophilin 4	0.7847
11334	TUSC2	tumor suppressor candidate 2	0.7381
22999	RIMS1	regulating synaptic membrane exocytosis 1	0.7039
23199	KIAA0182	KIAA0182	0.7468
25829	TMEM184B	transmembrane protein 184B	0.8504
25893	TRIM58	tripartite motif containing 58	0.8896
26232	FBXO2	F-box protein 2	0.7438
27069	GHITM	growth hormone inducible transmembrane protein	0.7924
27085	MTBP	Mdm2, transformed 3T3 cell double minute 2, p53 binding protein (mouse) binding protein, 104kDa	0.6782
29083	GTPBP8	GTP-binding protein 8 (putative)	0.9277
29966	STRN3	striatin, calmodulin binding protein 3	0.7282
30012	TLX3	T-cell leukemia homeobox 3	0.9596
51061	TXNDC11	thioredoxin domain containing 11	0.8687
51496	CTDSPL2	CTD (carboxy-terminal domain, RNA polymerase II, polypeptide A) small phosphatase like 2	0.7173
51523	CXXC5	CXXC finger protein 5	0.8102
55247	NEIL3	nei endonuclease VIII-like 3 (E. coli)	0.7141
55905	RNF114	ring finger protein 114	0.7926
55972	SLC25A40	solute carrier family 25, member 40	0.9378
56254	RNF20	ring finger protein 20	0.6883
56852	RAD18	RAD18 homolog (S. cerevisiae)	0.6922
56902	PNO1	partner of NOB1 homolog (S. cerevisiae)	0.696
56916	SMARCAD1	SWI/SNF-related, matrix-associated actin-dependent regulator of chromatin, subfamily a, containing DEAD/H box 1	0.9055
57465	TBC1D24	TBC1 domain family, member 24	0.8363
57584	ARHGAP21	Rho GTPase activating protein 21	0.8505
58497	PRUNE	prune homolog (Drosophila)	0.6731
60436	TGIF2	TGFB-induced factor homeobox 2	0.8459
65059	RAPH1	Ras association (RalGDS/AF-6) and pleckstrin homology domains 1	0.9544
65997	RASL11B	RAS-like, family 11, member B	0.9143
79072	FASTKD3	FAST kinase domains 3	0.9091
80162	ATHL1	ATH1, acid trehalase-like 1 (yeast)	0.8243
80218	NAA50	N(alpha)-acetyltransferase 50, NatE catalytic subunit	0.8046
80313	LRRC27	leucine rich repeat containing 27	0.753
81621	KAZALD1	Kazal-type serine peptidase inhibitor domain 1	0.6591
84303	CHCHD6	coiled-coil-helix-coiled-coil-helix domain containing 6	0.681
84913	ATOH8	atonal homolog 8 (Drosophila)	0.8049
84991	RBM17	RNA binding motif protein 17	0.9285
92912	UBE2Q2	ubiquitin-conjugating enzyme E2Q family member 2	0.8706
93210	PGAP3	post-GPI attachment to proteins 3	0.588
120103	SLC36A4	solute carrier family 36 (proton/amino acid symporter), member 4	0.8878
126410	CYP4F22	cytochrome P450, family 4, subfamily F, polypeptide 22	0.6015
130497	OSR1	odd-skipped related 1 (Drosophila)	0.5834
134353	LSM11	LSM11, U7 small nuclear RNA associated	0.8673
136895	C7orf31	chromosome 7 open reading frame 31	0.5991
153571	C5orf38	chromosome 5 open reading frame 38	0.8435
162699	TCEB3C	transcription elongation factor B polypeptide 3C (elongin A3)	0.7238
201158	FAM18B2	family with sequence similarity 18, member B2	0.7985
201780	SLC10A4	solute carrier family 10 (sodium/bile acid cotransporter family), member 4	0.9385
220323	OAF	OAF homolog (Drosophila)	0.8218
246269	LACE1	lactation elevated 1	0.6548
374470	C12orf42	chromosome 12 open reading frame 42	0.6288
376497	SLC27A1	solute carrier family 27 (fatty acid transporter), member 1	0.845
